# Supplementary material for: “I Am Okay With It, But I Am Not Going to Do It”: The Exogenous Factors Influencing Non-Participation in Medical Assistance in Dying
Source: PubMed Central journal article supplement (PMC8564235; doi:10.1177/10497323211027130), 2021-07-08
Supplement: sj-pdf-2-qhr-10.1177_10497323211027130.pdf [file sj-pdf-2-qhr-10.1177_10497323211027130.pdf]

Supplemental File 2: Contextual Data of Participants (N=35)

| <b>Contextual Data</b>                          | <b>Would Not Participate Beyond a Referral n = 14 (40%*)</b> | <b>Participants Who Would Provide More than a Referral, but not Formally Administer MAID n = 21 (60%*)</b> |
|-------------------------------------------------|--------------------------------------------------------------|------------------------------------------------------------------------------------------------------------|
| Nurse Practitioner                              | 6 (43%)                                                      | 12 (57%)                                                                                                   |
| Physician                                       | 8 (57%)                                                      | 9 (43%)                                                                                                    |
| Female                                          | 9 (64%)                                                      | 14 (67%)                                                                                                   |
| Male                                            | 5 (36%)                                                      | 7 (33%)                                                                                                    |
| Single/Never Married                            | 1 (7%)                                                       | -                                                                                                          |
| Married/Domestic Partnership                    | 13 (93%)                                                     | 17 (81%)                                                                                                   |
| Divorced                                        | -                                                            | 4 (19%)                                                                                                    |
| Age (years):                                    |                                                              |                                                                                                            |
| • 25-34                                         | 3 (21%)                                                      | 2 (10%)                                                                                                    |
| • 35-44                                         | 4 (29%)                                                      | 5 (24%)                                                                                                    |
| • 45-54                                         | 2 (14%)                                                      | 8 (38%)                                                                                                    |
| • 55 and older                                  | 5 (36%)                                                      | 6 (29%)                                                                                                    |
| Years in Practice:                              |                                                              |                                                                                                            |
| • 1-9                                           | 6 (43%)                                                      | 6 (29%)                                                                                                    |
| • 10-19                                         | 3 (21%)                                                      | 8 (38%)                                                                                                    |
| • 20-29                                         | 4 (29%)                                                      | 4 (19%)                                                                                                    |
| • 30-39                                         | 1 (7%)                                                       | 3 (14%)                                                                                                    |
| Significance of faith, religions, spirituality: | 7 (50%)                                                      | -                                                                                                          |
| • Extremely Significant                         | 3 (21%)                                                      | 5 (24%)                                                                                                    |
| • Very Significant                              | 2 (14%)                                                      | 2 (10%)                                                                                                    |
| • Significant                                   | 2 (14%)                                                      | 11 (52%)                                                                                                   |
| • Neutral                                       | -                                                            | 3 (14%)                                                                                                    |
| • Not Significant                               |                                                              |                                                                                                            |
| Belief system:                                  |                                                              |                                                                                                            |
| • Protestant                                    | 4 (29%)                                                      | 3 (14%)                                                                                                    |
| • Non-denominational Christianity               | 3 (21%)                                                      | 3 (14%)                                                                                                    |
| • Agnostic/Atheist                              | -                                                            | 4 (19%)                                                                                                    |
| • Islam                                         | 1 (7%)                                                       | -                                                                                                          |
| • Roman Catholic                                | 5 (36%)                                                      | 8 (38%)                                                                                                    |
| • Did not disclose/Other                        | 1 (7%)                                                       | 3 (14%)                                                                                                    |
| Location of Practice:**                         |                                                              |                                                                                                            |
| • Large Population Centre                       | 5 (36%)                                                      | 11 (52%)                                                                                                   |
| • Medium Population Centre                      | 1 (7%)                                                       | 2 (10%)                                                                                                    |
|                                                 | 3 (21%)                                                      | 6 (29%)                                                                                                    |

|                                                                                                                                                                     |                               |                                |
|---------------------------------------------------------------------------------------------------------------------------------------------------------------------|-------------------------------|--------------------------------|
| <ul style="list-style-type: none"> <li>• Small Population Centre</li> <li>• Rural area</li> </ul>                                                                   | 5 (36%)                       | 2 (10%)                        |
| <b>Primary Work Area:</b> <ul style="list-style-type: none"> <li>• Family Medicine/Primary Care</li> <li>• Specialty Practice Areas***</li> </ul>                   | 8 (57%)<br>6 (43%)            | 13 (62%)<br>8 (38%)            |
| <b>Patients with Life-Limiting Illness (%):</b> <ul style="list-style-type: none"> <li>• 0-19%</li> <li>• 20-39%</li> <li>• 40% or more</li> </ul>                  | 8 (57%)<br>4 (29%)<br>2 (14%) | 15 (71%)<br>4 (19%)<br>2 (10%) |
| <b>Responses in the interview were informed by:</b> <ul style="list-style-type: none"> <li>• An actual patient request</li> <li>• A hypothetical request</li> </ul> | 4 (29%)<br>10 (71%)           | 5 (24%)<br>16 (76%)            |

\* May equate 100% due to rounding.

\*\* The Statistics Canada definitions were provided to the participants to support selection.

\*\*\* Including, but not limited to, emergency medicine, internal medicine, anesthesiology, surgery, critical care, psychiatry, and physical and rehabilitation medicine.
